# Supplementary material for: Farnesoid X receptor activation by bile acids suppresses lipid peroxidation and ferroptosis
Source: PubMed Central journal article supplement (PMC10616197; doi:10.1038/s41467-023-42702-8), 2023-10-30
Supplement: 41467_2023_42702_MOESM1_ESM.pdf [file 41467_2023_42702_MOESM1_ESM.pdf]

## Supplementary Figures for

Farnesoid X Receptor activation by bile acids suppresses lipid peroxidation and ferroptosis

Juliane Tschuck<sup>1</sup>, Lea Theilacker<sup>1</sup>, Ina Rothenaigner<sup>1</sup>, Stefanie A. I. Weiß<sup>1</sup>, Banu Akdogan<sup>2</sup>, Van Thanh Lam<sup>3</sup>, Constanze Müller<sup>4</sup>, Roman Graf<sup>1</sup>, Stefanie Brandner<sup>1</sup>, Christian Pütz<sup>1</sup>, Tamara Rieder<sup>5</sup>, Philippe Schmitt-Kopplin<sup>4</sup>, Michelle Vincendeau<sup>3</sup>, Hans Zischka<sup>2,5</sup>, Kenji Schorpp<sup>1</sup>, and Kamyar Hadian<sup>1,§</sup>

<sup>1</sup> Research Unit Signaling and Translation, Helmholtz Zentrum München, Neuherberg, Germany

<sup>2</sup> Institute of Molecular Toxicology and Pharmacology, Helmholtz Zentrum München, Neuherberg, Germany

<sup>3</sup> Institute of Virology, Helmholtz Zentrum München, Neuherberg, Germany

<sup>4</sup> Research Unit Analytical BioGeoChemistry, Helmholtz Zentrum München, Neuherberg, Germany

<sup>5</sup> Institute of Toxicology and Environmental Hygiene, Technical University Munich, School of Medicine, Munich, Germany

§ Corresponding author: Kamyar Hadian, [kamyar.hadian@helmholtz-muenchen.de](mailto:kamyar.hadian@helmholtz-muenchen.de)

# Supplementary Figure 1

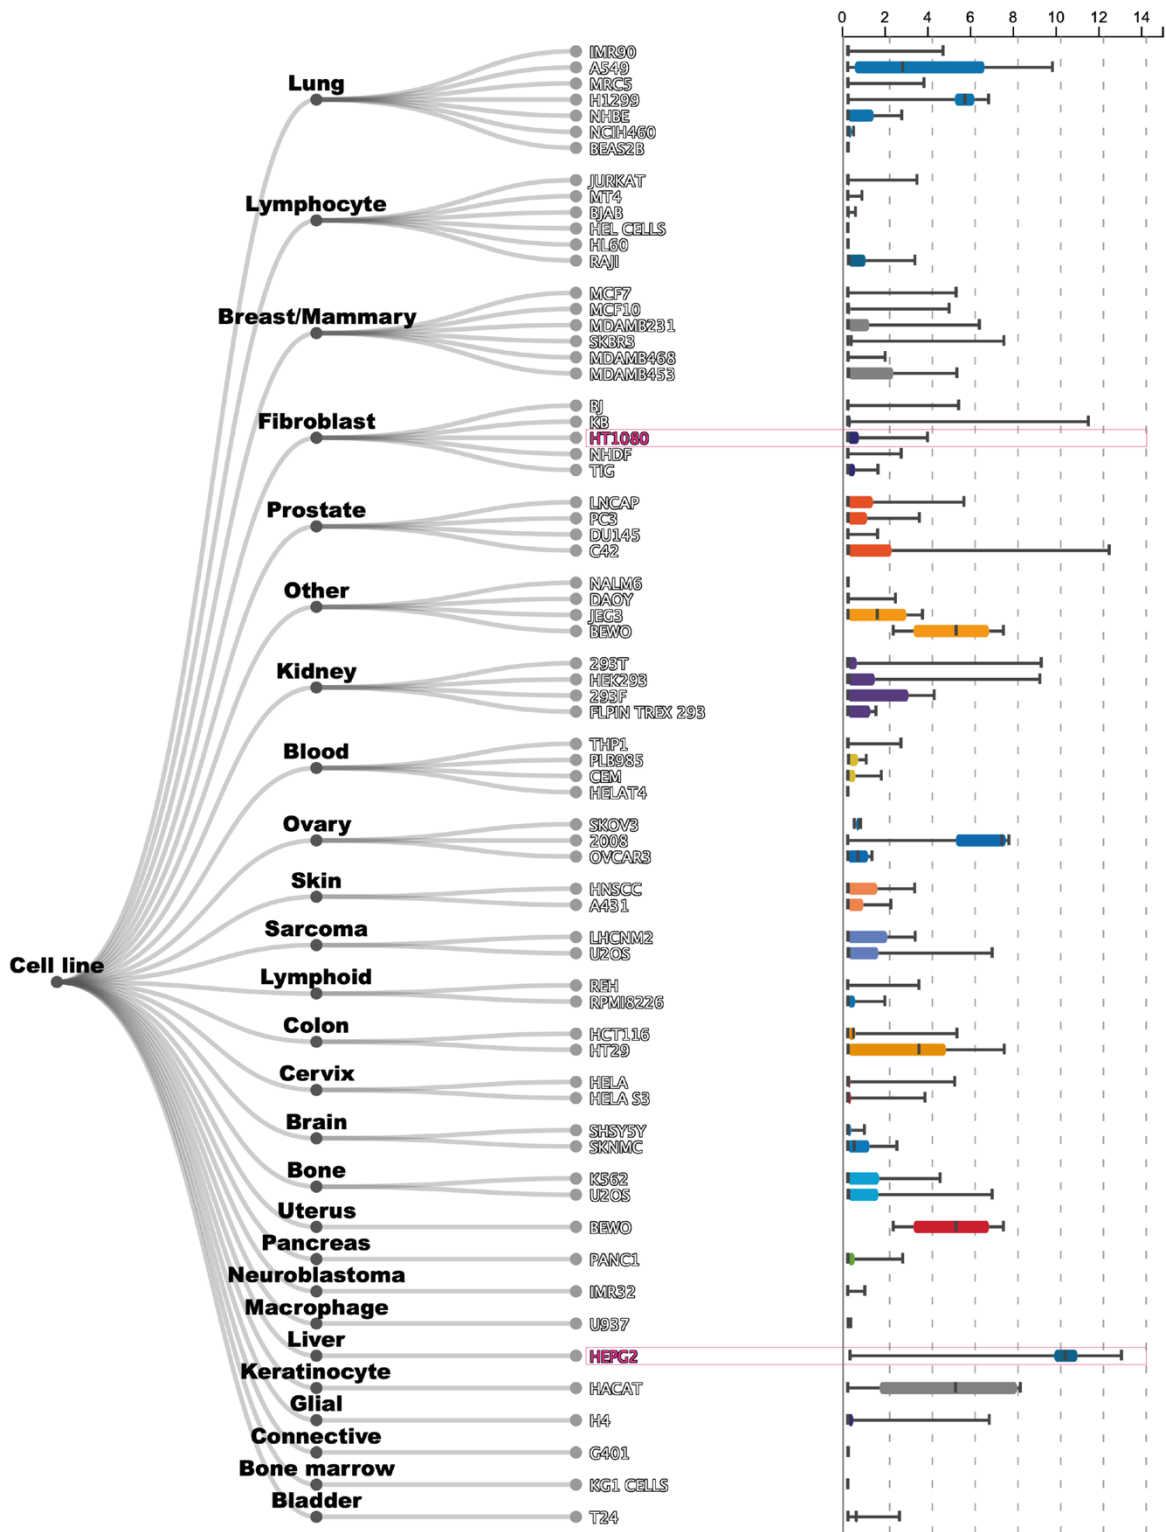

**Supplementary Figure 1.** Expression levels of FXR (NR1H4) across several cell lines extracted from ARCH<sup>4</sup> database (Lachmann, A., Torre, D., Keenan, A.B., Jagodnik, K.M., Lee, H.J., Wang, L., et al., 2018. Massive mining of publicly available RNA-seq data from human and mouse. Nat Commun 9(1):1366.)

## Supplementary Figure 2

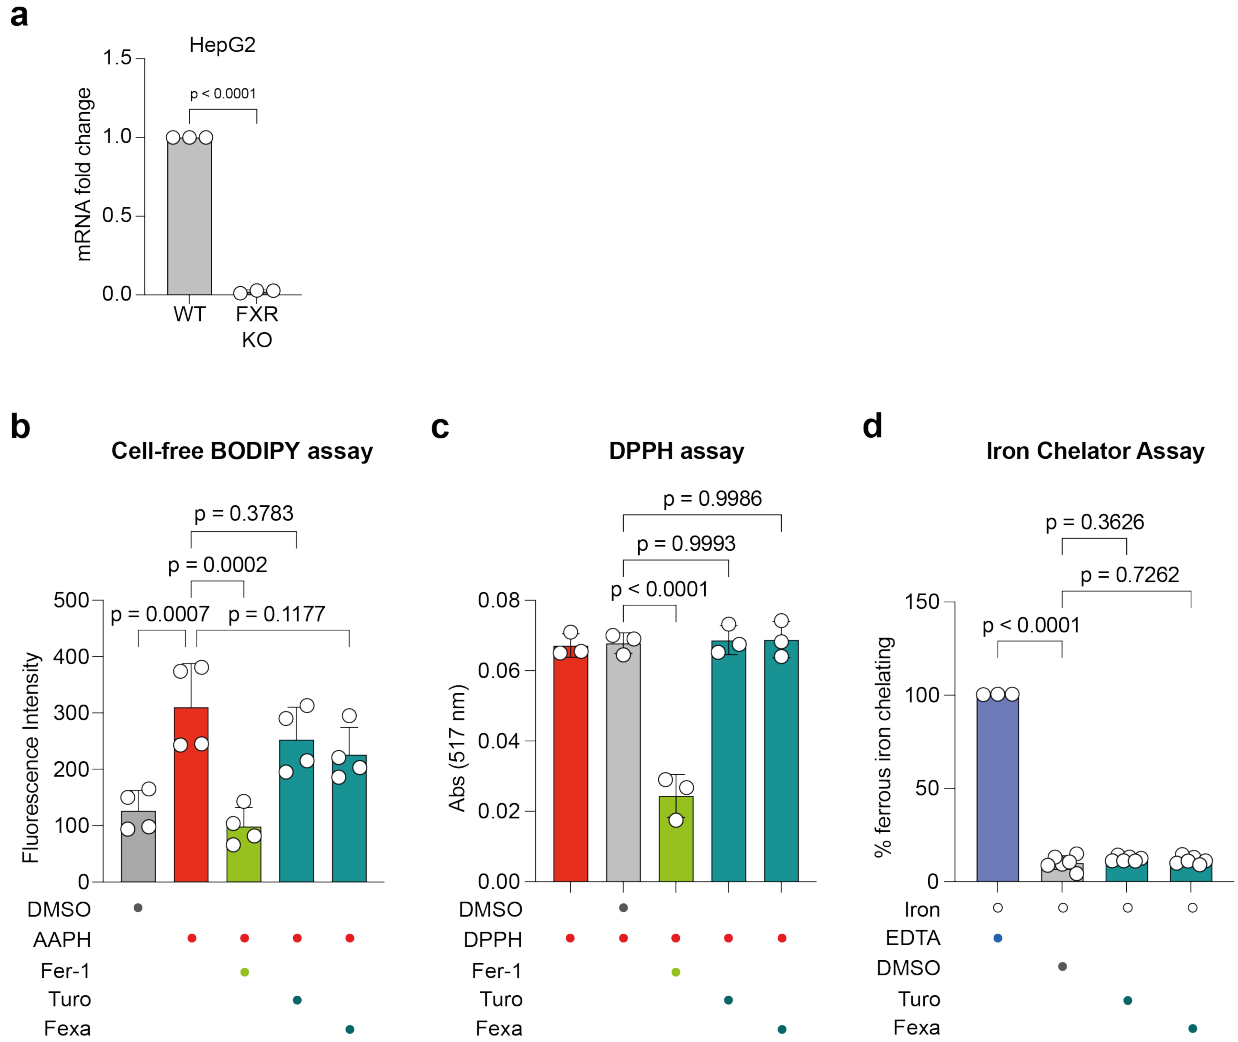

**Supplementary Figure 2.** **a** mRNA expression of FXR in wildtype (WT) and FXR knockout (KO) cells. Data are mean  $\pm$  SD of  $n = 3$  biological replicates; unpaired two-tailed  $t$ -test. **b** Turofexorate and Fexaramine have no antioxidant effects in a cell-free oxidizable BODIPY-C11 assay treated with 7.5 mM free-radical-producing 2,2'-azobis(2-methyl-propanimidamide) dihydrochloride (AAPH). In contrast, we observed significant decrease in oxidative fluorescence by Fer-1. Data are mean  $\pm$  SD of  $n = 4$  biological replicates; one-way ANOVA with Dunnett's test. **c** DPPH assay showed no antioxidant activity of Turofexorate and Fexaramine. All compounds were tested at a final concentration of 50  $\mu$ M. DPPH was used at 0.05 mM. Data are mean  $\pm$  SD of  $n = 3$  biological replicates, one-way ANOVA with Tukey's test. **d** 12  $\mu$ M Turofexorate or Fexaramine are not able to chelate iron (Fe(II)) in a Ferrozine-based assay. 100  $\mu$ M EDTA were used as a positive control. Data are mean  $\pm$  SD of  $n = 3$  (EDTA) or 6 (all other treatments) biological replicates; one-way ANOVA with Dunnett's test.

### Supplementary Figure 3

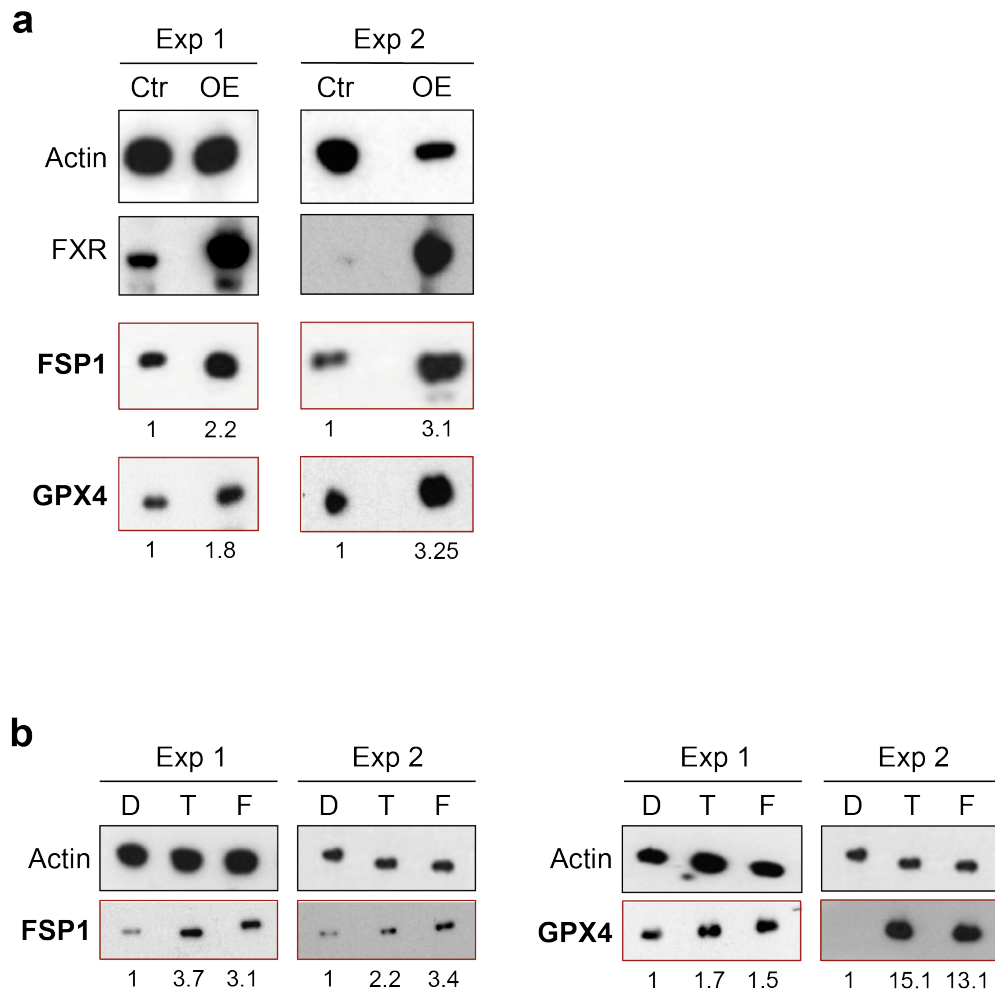

**Supplementary Figure 3. a** Western Blots of HT-1080 cells overexpressing FXR show an upregulation of target genes FSP1 and GPX4. **b** Western Blots of HepG2 cells treated with 12  $\mu$ M Turofexorate or Fexaramine for 2h show an upregulation of target genes FSP1 and GPX4. Bands were quantified using ImageJ and signals were normalized to  $\beta$ -Actin signals. Data from 2 biological replicates are shown. Antibodies are listed in Supplementary Tables 1 and 2.

**Supplementary Figure 4**

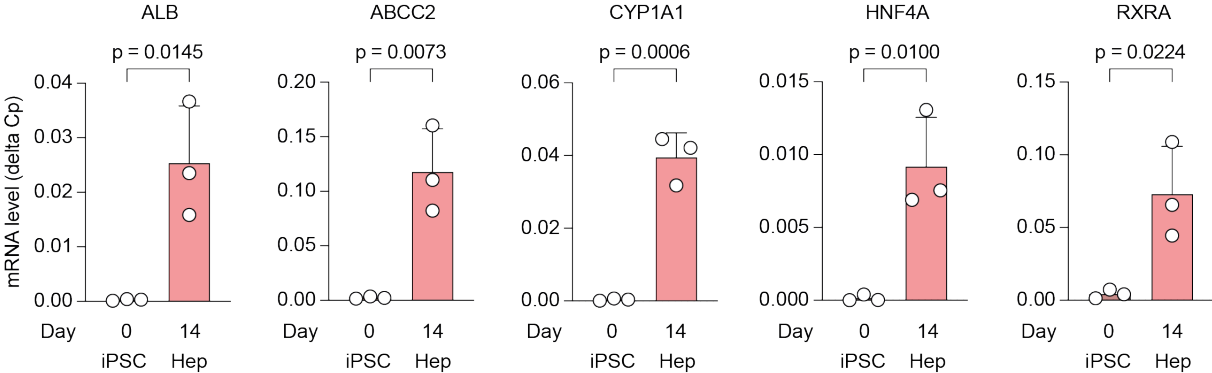

**Supplementary Figure 4.** Canonical differentiation markers of hepatocytes are upregulated on mRNA level after 14 days of differentiation compared to iPSCs at day 0. RP2 was used as a housekeeper gene for normalization. Data plotted are mean  $\pm$  SD of  $n = 3$  biological replicates; unpaired two-tailed t test.

## Supplementary Figure 5

Figure 2a

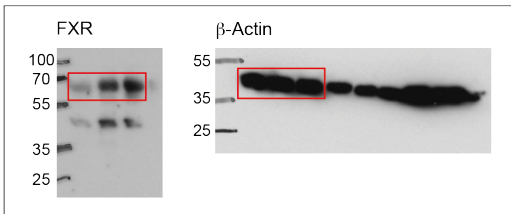

Figure 3b

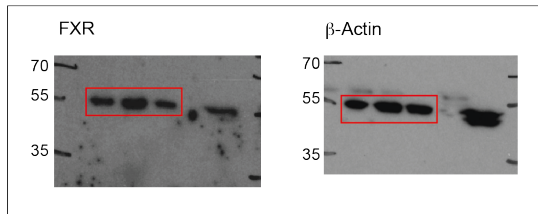

Supplementary Figure 3a

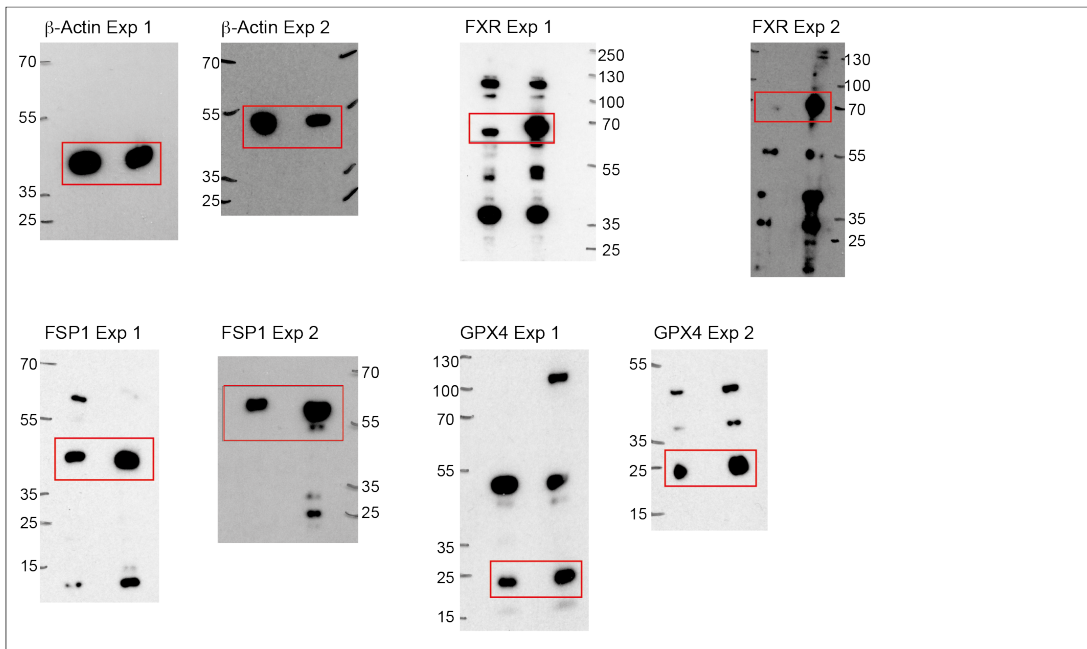

Supplementary Figure 3b

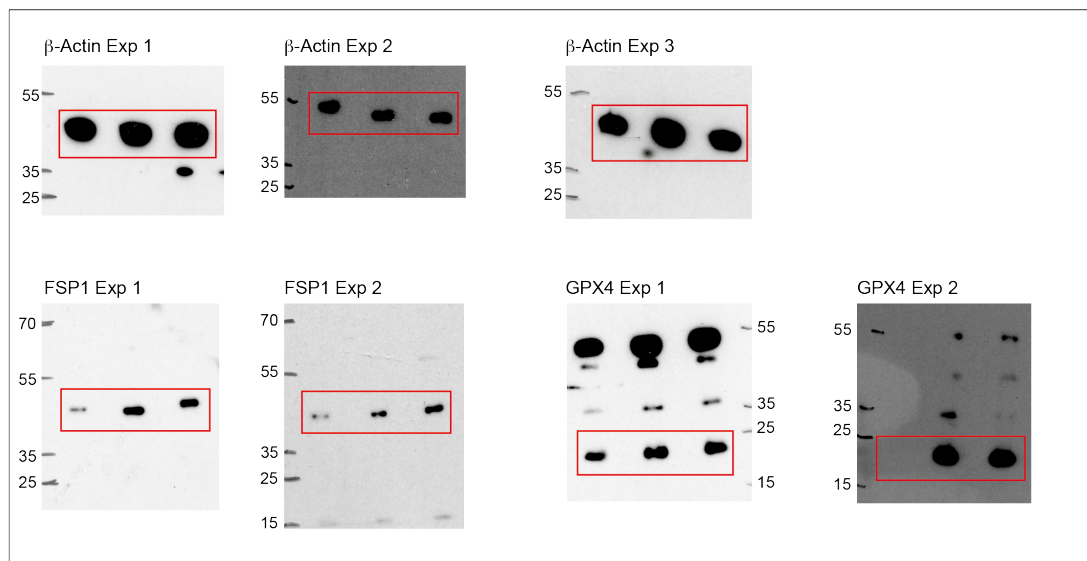

Supplementary Figure 5. Full scans of the Western Blots in Fig. 2a, 3b and Supplementary Fig. 3a, 3b

## Supplementary Figure 6

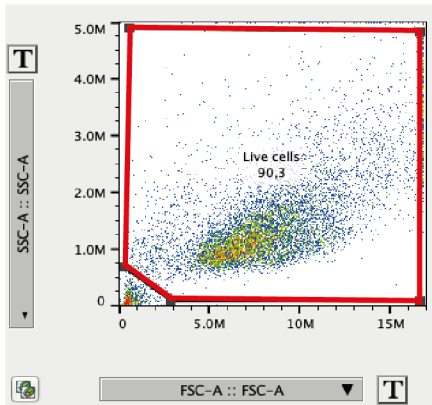

1. Exclude dead cells from scatter plot

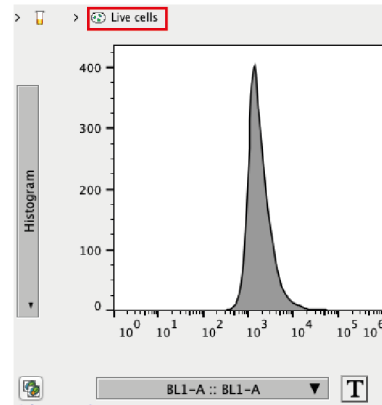

2. Plot histogram of live cells in BL1-A channel

|  | Sample Name          | Subset Name | Count | Median : BL1-A |
|--|----------------------|-------------|-------|----------------|
|  | Specimen Flexa 1.fcs | HT1080      | 9010  | 2588           |
|  | Specimen Turo 2.fcs  | HT1080      | 3822  | 4957           |
|  | Specimen Fer-1 1.fcs | HT1080      | 9062  | 1441           |
|  | Specimen RSL3 2.fcs  | HT1080      | 5374  | 16428          |
|  | Specimen DMSO.fcs    | HT1080      | 9098  | 1585           |

3. Extract median intensities of BL1-A channel

**Supplementary Figure 6.** Flow cytometry gating strategy and analysis for Fig. 1f, 4a, 4c, and 4d.

## Supplementary Tables

Supplementary Table 1:

| <b>Primary Antibodies</b> | <b>Dilution</b> | <b>Species</b> | <b>Supplier</b>                         |
|---------------------------|-----------------|----------------|-----------------------------------------|
| b-Actin (C4)              | 1:500           | mouse          | sc-47778, Santa Cruz<br>Biotechnology   |
| NR1H4 (FXR)               | 1:500           | rabbit         | ab228949, Abcam                         |
| FSP1 (AMID)               | 1:1000          | rabbit         | PA5-103183, Thermo<br>Fisher Scientific |
| GPX4                      | 1:1000          | rabbit         | ab125066, Abcam                         |

Supplementary Table 1:

| <b>Secondary Antibodies</b>    | <b>Dilution</b> | <b>Species</b> | <b>Supplier</b>                                                |
|--------------------------------|-----------------|----------------|----------------------------------------------------------------|
| HRP-conjugated anti-mouse IgG  | 1:7500          | donkey         | 715-035-150, Jackson<br>ImmunoResearch<br>Laboratories, Biozol |
| HRP-conjugated anti-rabbit IgG | 1:7500          | donkey         | 711-035-152, Jackson<br>ImmunoResearch<br>Laboratories, Biozol |
