# Supplementary material for: Farnesoid X receptor activation by bile acids suppresses lipid peroxidation and ferroptosis
Source: PubMed Central journal article supplement (PMC10616197; doi:10.1038/s41467-023-42702-8), 2023-10-30
Supplement: 41467_2023_42702_MOESM3_ESM.pdf [file 41467_2023_42702_MOESM3_ESM.pdf]

## **Description of Additional Supplementary Files**

### **File name: Supplementary Data 1**

Description: List of 3,684 compound IDs used in the compound screening in Figure 1a

### **File name: Supplementary Data 2**

Description: Optimal compound concentrations used in apoptosis (Fig. 1c), necroptosis (Fig. 1d), FIN56 (Fig. 1e), and C11-BODIPY (Fig. 1f) testing.

### **File name: Supplementary Data 3**

Description: Human and mouse qRT-PCR primers.
